# Supplementary material
Source: PubMed Central journal article supplement (PMC1747445)
Supplement: thorax_60_7_545__1.pdf [file thorax_60_7_545__1.pdf]

## CORRECTION

doi: 10.1136/thx.2005.029561corr1

In the paper entitled "No increase in the prevalence of asthma, allergies, and atopic sensitisation among children in Germany: 1992–2001" by I K Zöllner *et al* which appeared in the July 2005 issue of *Thorax* (2005;**60**:545–8), the authors apologise for a mistake which occurred in the reference list. Reference number 18 should be number 21 and references 19–21 should be listed as 18–20.
